# Supplementary material for: Efficient Regularized Regression with L 0 Penalty for Variable Selection and Network Construction
Source: Comput Math Methods Med. 2016 Oct 24;2016:3456153. doi: 10.1155/2016/3456153 (PMC5098106; doi:10.1155/2016/3456153)
Supplement: Supplementary file 1 — LpEM Algorthm and Statistical Properties. [file 3456153.f1.pdf]

---

## Appendix: $L_p$ EM and Statistical Properties

*$L_p$ EM Algorithm:*

The proposed approach for  $L_0$  regularized regression method can be extended to solve a general  $L_p$   $p \in (0, 2]$  problem naturally, which includes the well known elastic net with  $p \in [1, 2]$  (Zou & Zhang 2009) and the combination of  $L_1$  and  $L_0$  with  $p \in (0, 1]$  (Liu & Wu, 2007). Mathematically, the general  $L_p$  problem can be defined as:

$$E = \frac{1}{2} \|\mathbf{y} - X\theta\|^2 + \frac{\lambda}{2} \sum_{j=1}^m |\theta|^p,$$

which is equivalent to

$$E = \frac{1}{2} \|\mathbf{y} - X\theta\|^2 + \frac{\lambda}{2} \sum_{j \in m} \frac{\theta_j^2}{\eta_j^{2-p}}$$

$$\eta = \theta.$$

let  $D_p = \text{diag}(\eta_1^{2-p}, \dots, \eta_m^{2-p})$ , similar ideas in the manuscript can be used to get the following equation for the general  $L_p$ EM method:

$$\eta^{2-p} \odot \frac{\partial E}{\partial \theta} = \lambda \theta - D_p X^t (\mathbf{y} - X\theta) = \lambda \theta - D_p X^t (\mathbf{y} - X\theta) = 0.$$

Solving above equation, we have the following explicit solution.

$$\theta = (D_p X^t X + \lambda I)^{-1} D_p X^t \mathbf{y}$$

$$\eta = \theta,$$

The general  $L_p$ EM algorithm is as follows:

---

**$L_p$ EM Algorithm:**

Given a  $0 < \lambda \leq \lambda_{\max}$ , and  $p \in [0, 2]$ ,  $\epsilon = 1e - 6$  and  $\varepsilon = 1e - 6$ ,

and training data  $\{X, \mathbf{y}\}$ ,

Initializing  $\theta = (X^t X + \lambda I)^{-1} X^t \mathbf{y}$ ,

While 1,

    E-step:  $\eta = \theta$ , and  $D_p = \text{diag}(\eta_1^{2-p}, \dots, \eta_m^{2-p})$

    M-step:  $\theta = (D_p X^t X + \lambda I)^{-1} D_p X^t \mathbf{y}$

    if  $\|\theta - \eta\| < \varepsilon$ , Break; End

End

---

*Statistical Properties for Exact  $L_0$  Regularized Regression:*

**Consistency and Oracle Property:** Let  $\theta_0$  be the true parameter value. The following conditions will be used later for theoretical properties of the  $L_0$ -regularized estimator of  $\theta_0$ .

*CONDITIONS*

- (C1)  $\ln(m) = o(n)$  as  $n \rightarrow \infty$ .
- (C2) There exists a constant  $K > 0$  such that  $\lambda_{\max}(\frac{X^t X}{n}) \leq K < \infty$  for large  $n$ , where for any matrix  $B$ ,  $\lambda_{\max}(B)$  denotes the largest eigenvalue of  $B$ .

- (C3)  $\frac{\max_j \|\mathbf{x}_j\|}{\sqrt{n}} = O(\sqrt{\ln(mn)})$  or  $O(1)$  as  $n, m \rightarrow \infty$ .  
 (C4) There exists a constant  $c > 0$  such that  $\frac{\min_j \|\mathbf{x}_j\|^2}{n} \geq c > 0$  for large  $n, m$ .  
 (C5)  $\mu(X) \equiv \max_{1 \leq i < j \leq m} \frac{|\mathbf{x}_i^t \mathbf{x}_j|}{\|\mathbf{x}_i\| \cdot \|\mathbf{x}_j\|} = O(\sqrt{\frac{\ln(m)}{n}})$ .  
 (C6)  $\|\theta\|_0 = O(1)$ .

The above conditions are very mild. Condition (C1) trivially holds for  $m \leq n$ . In particular, (C1) is satisfied even for ultra-high dimensional case such as  $m = \exp(n^\alpha)$  for  $0 < \alpha < 1$ . (C2) is a standard condition for linear regression. Chi (2013, Section 3.2) gives examples satisfying (C3)-(C4). For example, (C3) and (C4) trivially hold if  $\|\mathbf{x}_j\| = \sqrt{n}$  for all  $j = 1, \dots, m$ . (C5) is referred to as the coherence condition under which the covariates are not highly colinear; see Bunea et al. (2007), Candès and Plan (2009), and Chi (2013). (C6) implies that the model is sparse.

The following theorem is a direct consequence of Chi (2013).

**Theorem 1 (Consistency)** *Assume that conditions (C1)-(C6) hold. Let  $n(\nu) = (1 - \nu)[1 + 1/\mu(X)]$  for some  $0 < \nu < 1$ . For any  $0 < q < \frac{1}{2}$ , let  $\lambda = \frac{3\ln(m/q)}{\nu[1 + \mu(X)]} \frac{\max_j \|\mathbf{x}_j\|^2}{\min_j \|\mathbf{x}_j\|^2}$ , and*

$$\hat{\theta} = \arg \min_{\|\theta\|_0 \leq n(\nu)} E_n(\theta).$$

Then, with probability tending to 1,

$$\|\hat{\theta} - \theta_0\| = O_p\left(\sqrt{\frac{\ln(nm)}{n}}\right) \quad (1)$$

**Proof** Note that the normal linear model in this paper is a special case of the exponential model of Chi (2009):  $p_t(y) = \exp(ty - \Lambda(t))$  with  $t = \frac{\mathbf{x}_i^t \theta}{\sigma^2}$  and  $\Lambda(t) = \frac{\sigma^2 t^2}{2}$ . Then, (??) follows immediately from Theorem 3.1 of Chi (2009).

**Model Recovery:** Next we show that with large probability  $L_0$ -regularized regression recovers the true model under mild conditions.

**Theorem 2 (Oracle Property)** *Assume that conditions (C1)-(C6) hold. Let  $A = \{1 \leq j \leq m : \theta_{0j} \neq 0\}$ , and  $A^c = \{1, 2, \dots, m\} \setminus A$ . Then, the minimizer  $\hat{\theta}$  in Theorem ?? must satisfy  $\hat{\theta}_j = 0$  for  $j \in A^c$  with probability tending to 1 as  $n$  goes to  $\infty$ .*

**Proof** Let  $\alpha_n = \sqrt{\frac{\ln(nm)}{n}}$ . For any  $\theta$  such that  $\|\theta - \theta_0\| < C\alpha_n$  for some constant  $C > 0$  and  $\sum_{j \in A^c} I(\theta_j \neq 0) \geq 1$ , let

$$\tilde{\theta}_j = \begin{cases} \theta_j & \text{if } j \in A \\ 0 & \text{if } j \in A^c \end{cases}$$

Then,

$$\begin{aligned}
& E_n(\theta) - E_n(\tilde{\theta}) \\
&= \frac{1}{2n}(\theta - \tilde{\theta})^T X^T X (\theta - \tilde{\theta}) - \frac{1}{n}(\theta - \tilde{\theta})^T X^T (y - X\tilde{\theta}) + \frac{\lambda}{2}(\|\theta\|_0 - \|\tilde{\theta}\|_0) \\
&= \frac{1}{2n}(\theta - \tilde{\theta})^T X^T X (\theta - \tilde{\theta}) - \frac{1}{n}(\theta - \tilde{\theta})^T X^T (X\theta_0 + \epsilon - X\tilde{\theta}) + \frac{\lambda}{2}(\|\theta\|_0 - \|\tilde{\theta}\|_0) \\
&= \frac{1}{2}(\theta - \tilde{\theta})^T \left( \frac{X^T X}{n} \right) (\theta - \tilde{\theta}) - (\theta - \tilde{\theta})^T \left( \frac{X^T X}{n} \right) (\theta_0 - \tilde{\theta}) + \\
&\quad + \frac{1}{\sqrt{n}}(\theta - \tilde{\theta})^T \cdot \frac{1}{\sqrt{n}}X^T \epsilon + \frac{\lambda}{2}(\|\theta\|_0 - \|\tilde{\theta}\|_0) \\
&= I_1 + I_2 + I_3 + I_4
\end{aligned}$$

Because  $\|\tilde{\theta} - \theta_0\| \leq \|\theta - \theta_0\|$ , we have  $\theta - \tilde{\theta} = O(\alpha_n)$ . Thus,  $I_1 = O(\alpha_n^2)$  and  $I_2 = O(\alpha_n^2)$ . Moreover,

$$\left\| \frac{1}{\sqrt{n}}\epsilon^t X \right\| = O_p(\sqrt{k\sigma^2}), \quad \text{as } n \rightarrow \infty$$

where  $k = \text{rank}(X) \leq n$ . Hence,

$$|I_3| \leq \frac{1}{\sqrt{n}}\|\theta - \tilde{\theta}\| \cdot \left\| \frac{1}{\sqrt{n}}X^T \epsilon \right\| = O(\alpha_n) \cdot O_p(\sqrt{k/n}) = O_p(\alpha_n).$$

Furthermore,

$$\begin{aligned}
I_4 &= \frac{\lambda}{2}(\|\theta\|_0 - \|\tilde{\theta}\|_0) \\
&= \frac{\lambda}{2} \sum_{j=1}^m [I(\theta_j \neq 0) - I(\tilde{\theta}_j \neq 0)] \\
&= \frac{\lambda}{2} \left[ \sum_{j \in A} 0 \right] + \frac{\lambda}{2} \sum_{j \in A^c} [I(\theta_j \neq 0) - 0] \\
&= \frac{\lambda}{2} \sum_{j \in A^c} I(\theta_j \neq 0) \geq \frac{\lambda}{2} \cdot 1 > 0.
\end{aligned}$$

By conditions (C3)-(C5),  $\lambda = O(\ln(m) \cdot \ln(nm))$ . Therefore, the first three terms  $I_1$ ,  $I_2$  and  $I_3$  are dominated by  $\lambda$  in probability as  $n \rightarrow \infty$ . Therefore, with probability tending to 1,

$$E_n(\theta) - E_n(\tilde{\theta}) > 0. \quad (2)$$

This completes the proof of Theorem ??.
